# Supplementary material for: Trends in the Development of Acupuncture-Related Technologies Based on Patents in South Korea
Source: Hindawi journal article supplement (doi:10.1155/2024/2204071), 2024-04-23
Supplement: f1 [file 2204071.f1.pdf]

Supplementary Table 1. Frequency analysis according to the International Patent Classification

| Class                                                                               | No.                                               | %   | Explanation                                                                         |                                                                                                                          |
|-------------------------------------------------------------------------------------|---------------------------------------------------|-----|-------------------------------------------------------------------------------------|--------------------------------------------------------------------------------------------------------------------------|
| <b>A61<br/>(MEDICAL OR<br/>VETERINARY<br/>SCIENCE;<br/>HYGIENE)</b>                 | <b>B<br/>(DIAGNOSIS; SURGERY; IDENTIFICATION)</b> |     |                                                                                     |                                                                                                                          |
|                                                                                     | 001/233                                           | 1   | 0.9                                                                                 | - for the nose, i.e., nasoscopes                                                                                         |
|                                                                                     | 005/00                                            | 3   | 2.6                                                                                 | Measuring for diagnostic purposes; Identification of persons                                                             |
|                                                                                     | 005/0402                                          | 1   | 0.9                                                                                 | Electrocardiography, i.e., ECG                                                                                           |
|                                                                                     | 005/0476                                          | 1   | 0.9                                                                                 | Electroencephalography                                                                                                   |
|                                                                                     | 005/053                                           | 1   | 0.9                                                                                 | Measuring electrical impedance or conductance of a portion of the body                                                   |
|                                                                                     | 005/103                                           | 1   | 0.9                                                                                 | Measuring devices for testing the shape, pattern, size, or movement of the body or parts thereof for diagnostic purposes |
|                                                                                     | 008/00                                            | 1   | 0.9                                                                                 | Diagnosis using ultrasonic, sonic, or infrasonic waves                                                                   |
|                                                                                     | 008/08                                            | 1   | 0.9                                                                                 | Detecting organic movements or changes, e.g., tumors, cysts, swellings                                                   |
|                                                                                     |                                                   |     |                                                                                     |                                                                                                                          |
|                                                                                     | <b>C<br/>(DENTISTRY; ORAL OR DENTAL HYGIENE)</b>  |     |                                                                                     |                                                                                                                          |
|                                                                                     | 007/08                                            | 1   | 0.9                                                                                 | Mouthpiece-type retainers                                                                                                |
| 013/34                                                                              | 1                                                 | 0.9 | Making or working of models, e.g., preliminary castings, trial dentures; Dowel pins |                                                                                                                          |
| <b>F<br/>(FILTERS IMPLANTABLE INTO BLOOD VESSELS; PROSTHESES; DEVICES PROVIDING</b> |                                                   |     |                                                                                     |                                                                                                                          |

**PATENCY TO, OR PREVENTING COLLAPSING OF, TUBULAR STRUCTURES OF THE BODY, e.g., STENTS; ORTHOPAEDIC, NURSING, OR CONTRACEPTIVE DEVICES; FOMENTATION; TREATMENT OR PROTECTION OF EYES OR EARS; BANDAGES, DRESSINGS OR ABSORBENT PADS; FIRST-AID KITS)**

|        |   |     |                                                                                              |
|--------|---|-----|----------------------------------------------------------------------------------------------|
| 005/00 | 1 | 0.9 | Orthopedic methods or devices for non-surgical treatment of bones or joints; Nursing devices |
| 007/00 | 1 | 0.9 | Heating or cooling appliances for medical or therapeutic treatment of the human body         |
| 013/00 | 2 | 1.7 | Bandages or dressings; Absorbent pads                                                        |
| 013/02 | 1 | 0.9 | Adhesive plasters or dressings                                                               |
|        |   |     |                                                                                              |

**H  
(PHYSICAL THERAPY APPARATUS, e.g., DEVICES FOR LOCATING OR STIMULATING REFLEX POINTS IN THE BODY; ARTIFICIAL RESPIRATION; MASSAGE; BATHING DEVICES FOR SPECIAL THERAPEUTIC OR HYGIENIC PURPOSES OR SPECIFIC PARTS OF THE BODY)**

|        |    |      |                                                                                                                |
|--------|----|------|----------------------------------------------------------------------------------------------------------------|
| 009/00 | 1  | 0.9  | Pneumatic or hydraulic massage                                                                                 |
| 023/02 | 1  | 0.9  | - with electric or magnetic drive                                                                              |
| 039/00 | 10 | 8.5  | Devices for locating or stimulating specific reflex points of the body for physical therapy, e.g., acupuncture |
| 039/02 | 3  | 2.6  | Devices for locating such points                                                                               |
| 039/08 | 27 | 23.1 | Devices for applying needles to such points, i.e., for acupuncture                                             |

**M  
(DEVICES FOR INTRODUCING MEDIA INTO, OR ONTO, THE BODY; DEVICES FOR**

|                                                                       |                                                                                                                                                                                                         |   |     |                                                                                                                                                                                 |
|-----------------------------------------------------------------------|---------------------------------------------------------------------------------------------------------------------------------------------------------------------------------------------------------|---|-----|---------------------------------------------------------------------------------------------------------------------------------------------------------------------------------|
|                                                                       | <b>TRANSDUCING BODY MEDIA OR FOR TAKING MEDIA FROM THE BODY; DEVICES FOR PRODUCING OR ENDING SLEEP OR STUPOR)</b>                                                                                       |   |     |                                                                                                                                                                                 |
|                                                                       | 021/00                                                                                                                                                                                                  | 1 | 0.9 | Other devices or methods to cause a change in the state of consciousness; Devices for producing or ending sleep by mechanical, optical, or acoustical means, e.g., for hypnosis |
|                                                                       | 037/00                                                                                                                                                                                                  | 1 | 0.9 | Other apparatus for introducing media into the body; Percutany, i.e., introducing medicines into the body by diffusion through the skin                                         |
|                                                                       | <b>N<br/>(ELECTROTHERAPY; MAGNETOTHERAPY; RADIATION THERAPY; ULTRASOUND THERAPY)</b>                                                                                                                    |   |     |                                                                                                                                                                                 |
|                                                                       | 001/04                                                                                                                                                                                                  | 2 | 1.7 | Electrodes                                                                                                                                                                      |
|                                                                       | 001/05                                                                                                                                                                                                  | 6 | 5.1 | - for implantation or insertion into the body, e.g., heart electrode                                                                                                            |
|                                                                       | 001/18                                                                                                                                                                                                  | 2 | 1.7 | Applying electric currents by contact electrodes                                                                                                                                |
|                                                                       | 001/32                                                                                                                                                                                                  | 1 | 0.9 | - alternating or intermittent currents                                                                                                                                          |
|                                                                       | 001/36                                                                                                                                                                                                  | 9 | 7.7 | - for stimulation, e.g. heart pace-makers                                                                                                                                       |
|                                                                       | 005/06                                                                                                                                                                                                  | 2 | 1.7 | - using light                                                                                                                                                                   |
| <b>B21<br/>(MECHANICAL METAL-WORKING WITHOUT ESSENTIALLY REMOVING</b> | <b>C<br/>(MANUFACTURE OF METAL SHEETS, WIRE, RODS, TUBES, OR PROFILES, OTHERWISE THAN BY ROLLING; AUXILIARY OPERATIONS USED IN CONNECTION WITH METAL-WORKING WITHOUT ESSENTIALLY REMOVING MATERIAL)</b> |   |     |                                                                                                                                                                                 |
|                                                                       | 001/00                                                                                                                                                                                                  | 1 | 0.9 | Manufacture of metal sheets, metal wire, metal rods, metal tubes by drawing                                                                                                     |
|                                                                       | <b>F<br/>(WORKING OR PROCESSING OF METAL WIRE)</b>                                                                                                                                                      |   |     |                                                                                                                                                                                 |

|                                                                                                           |                                                                                                                                                                             |        |                                                                           |                                                                                            |                                                          |
|-----------------------------------------------------------------------------------------------------------|-----------------------------------------------------------------------------------------------------------------------------------------------------------------------------|--------|---------------------------------------------------------------------------|--------------------------------------------------------------------------------------------|----------------------------------------------------------|
| <b>MATERIAL;<br/>PUNCHING<br/>METAL)</b>                                                                  | 003/02                                                                                                                                                                      | 1      | 0.9                                                                       | - helically                                                                                |                                                          |
|                                                                                                           | 045/00                                                                                                                                                                      | 1      | 0.9                                                                       | Wire-working in the manufacture of other particular articles                               |                                                          |
|                                                                                                           | <b>G<br/>(MAKING NEEDLES, PINS, OR NAILS OF METAL)</b>                                                                                                                      |        |                                                                           |                                                                                            |                                                          |
|                                                                                                           | 001/00                                                                                                                                                                      | 2      | 1.7                                                                       | Making needles used for performing operations                                              |                                                          |
|                                                                                                           | 001/08                                                                                                                                                                      | 1      | 0.9                                                                       | - of hollow needles or needles with hollow ends, e.g., hypodermic needles, larding-needles |                                                          |
|                                                                                                           | 001/12                                                                                                                                                                      | 2      | 1.7                                                                       | Securing, cleaning-off burrs, reconditioning, polishing, grinding                          |                                                          |
|                                                                                                           | <b>K<br/>(SOLDERING OR UNSOLDERING; WELDING; CLADDING OR PLATING BY SOLDERING OR WELDING; CUTTING BY APPLYING HEAT LOCALLY, e.g., FLAME CUTTING; WORKING BY LASER BEAM)</b> |        |                                                                           |                                                                                            |                                                          |
|                                                                                                           | <b>B23<br/>(MACHINE<br/>TOOLS;<br/>METAL-<br/>WORKING<br/>NOT<br/>OTHERWISE<br/>PROVIDED<br/>FOR)</b>                                                                       | 026/03 | 1                                                                         | 0.9                                                                                        | Observing, e.g., monitoring, the workpiece               |
|                                                                                                           |                                                                                                                                                                             | 026/06 | 1                                                                         | 0.9                                                                                        | Shaping the laser beam, e.g., by masks or multi-focusing |
|                                                                                                           |                                                                                                                                                                             | 026/21 | 1                                                                         | 0.9                                                                                        | - by welding                                             |
| 026/324                                                                                                   |                                                                                                                                                                             | 1      | 0.9                                                                       | - involving non-metallic parts                                                             |                                                          |
| 026/70                                                                                                    |                                                                                                                                                                             | 1      | 0.9                                                                       | Auxiliary operations or equipment                                                          |                                                          |
| 037/04                                                                                                    |                                                                                                                                                                             | 1      | 0.9                                                                       | - for holding or positioning work                                                          |                                                          |
| <b>P<br/>(METAL-WORKING NOT OTHERWISE PROVIDED FOR; COMBINED OPERATIONS;<br/>UNIVERSAL MACHINE TOOLS)</b> |                                                                                                                                                                             |        |                                                                           |                                                                                            |                                                          |
| 015/00                                                                                                    | 2                                                                                                                                                                           | 1.7    | Making specific metal objects by operations not covered by a single other |                                                                                            |                                                          |

|                                                                                                  |                                                                                                                                                                                    |   |     |                                                                                                              |
|--------------------------------------------------------------------------------------------------|------------------------------------------------------------------------------------------------------------------------------------------------------------------------------------|---|-----|--------------------------------------------------------------------------------------------------------------|
| <b>B24<br/>(GRINDING;<br/>POLISHING)</b>                                                         |                                                                                                                                                                                    |   |     | subclass or a group in this subclass                                                                         |
|                                                                                                  | 019/10                                                                                                                                                                             | 2 | 1.7 | Aligning parts to be fitted together                                                                         |
|                                                                                                  | 023/04                                                                                                                                                                             | 3 | 2.6 | - for both machining and other metal-working operations                                                      |
|                                                                                                  | <b>B<br/>(MACHINES, DEVICES, OR PROCESSES FOR GRINDING OR POLISHING; DRESSING OR<br/>CONDITIONING OF ABRADING SURFACES; FEEDING OF GRINDING, POLISHING, OR<br/>LAPPING AGENTS)</b> |   |     |                                                                                                              |
|                                                                                                  | 019/16                                                                                                                                                                             | 1 | 0.9 | - for grinding sharp-pointed workpieces, e.g., needles, pens, fish hooks, tweezers<br>or record player styli |
|                                                                                                  | 029/08                                                                                                                                                                             | 1 | 0.9 | - the cross-section being circular, e.g., tubes, wires, needles                                              |
|                                                                                                  | 041/02                                                                                                                                                                             | 1 | 0.9 | Frames; Beds; Carriages                                                                                      |
| <b>B25<br/>(HAND TOOLS;<br/>PORTABLE<br/>POWER-<br/>DRIVEN<br/>TOOLS;<br/>MANIPULATO<br/>RS)</b> | <b>J<br/>(MANIPULATORS; CHAMBERS PROVIDED WITH MANIPULATION DEVICES)</b>                                                                                                           |   |     |                                                                                                              |
|                                                                                                  | 009/00                                                                                                                                                                             | 1 | 0.9 | Program-controlled manipulators                                                                              |
| <b>B29<br/>(WORKING OF<br/>PLASTICS;<br/>WORKING OF<br/>SUBSTANCES<br/>IN A PLASTIC</b>          | <b>C<br/>(SHAPING OR JOINING OF PLASTICS; SHAPING OF MATERIAL IN A PLASTIC STATE, NOT<br/>OTHERWISE PROVIDED FOR; AFTER-TREATMENT OF THE SHAPED PRODUCTS, e.g.,<br/>REPAIRING)</b> |   |     |                                                                                                              |
|                                                                                                  | 059/02                                                                                                                                                                             | 1 | 0.9 | - by mechanical means, e.g., pressing                                                                        |

|                                                                                                                                                                                                                                                                              |                                                                                                                                                                                                                                                                              |   |     |                                                                       |
|------------------------------------------------------------------------------------------------------------------------------------------------------------------------------------------------------------------------------------------------------------------------------|------------------------------------------------------------------------------------------------------------------------------------------------------------------------------------------------------------------------------------------------------------------------------|---|-----|-----------------------------------------------------------------------|
| <b>STATE IN GENERAL)</b><br><br><b>B65</b><br><b>(CONVEYING; PACKING; STORING; HANDLING THIN OR FILAMENTARY MATERIAL)</b><br><br><b>C09</b><br><b>(DYES; PAINTS; POLISHES; NATURAL RESINS; ADHESIVES; COMPOSITIONS NOT OTHERWISE PROVIDED FOR; APPLICATIONS OF MATERIALS</b> |                                                                                                                                                                                                                                                                              |   |     |                                                                       |
|                                                                                                                                                                                                                                                                              | <b>B</b><br><b>(MACHINES, APPARATUS, OR DEVICES FOR, OR METHODS OF, PACKAGING ARTICLES OR MATERIALS; UNPACKING)</b>                                                                                                                                                          |   |     |                                                                       |
|                                                                                                                                                                                                                                                                              | 015/00                                                                                                                                                                                                                                                                       | 1 | 0.9 | Attaching articles to cards, sheets, strings, webs, or other carriers |
|                                                                                                                                                                                                                                                                              | <b>D</b><br><b>(CONTAINERS FOR STORAGE OR TRANSPORT OF ARTICLES OR MATERIALS, e.g., BAGS, BARRELS, BOTTLES, BOXES, CANS, CARTONS, CRATES, DRUMS, JARS, TANKS, HOPPERS, FORWARDING CONTAINERS; ACCESSORIES, CLOSURES, OR FITTINGS THEREFOR; PACKAGING ELEMENTS; PACKAGES)</b> |   |     |                                                                       |
|                                                                                                                                                                                                                                                                              | 085/24                                                                                                                                                                                                                                                                       | 1 | 0.9 | - for needles, nails, or similar small elongated articles             |
|                                                                                                                                                                                                                                                                              | <b>J</b><br><b>(ADHESIVES; NON-MECHANICAL ASPECTS OF ADHESIVE PROCESSES IN GENERAL; ADHESIVE PROCESSES NOT PROVIDED FOR ELSEWHERE; USE OF MATERIALS AS ADHESIVES)</b>                                                                                                        |   |     |                                                                       |
|                                                                                                                                                                                                                                                                              | 133/08                                                                                                                                                                                                                                                                       | 1 | 0.9 | Homopolymers or copolymers of acrylic acid esters                     |
|                                                                                                                                                                                                                                                                              | 171/02                                                                                                                                                                                                                                                                       | 1 | 0.9 | Polyalkylene oxides                                                   |
|                                                                                                                                                                                                                                                                              | 175/04                                                                                                                                                                                                                                                                       | 1 | 0.9 | Polyurethanes                                                         |
|                                                                                                                                                                                                                                                                              | 189/00                                                                                                                                                                                                                                                                       | 1 | 0.9 | Adhesives based on proteins; Adhesives based on derivatives thereof   |

|                                                                               |                                                                                                                           |     |     |                                                   |
|-------------------------------------------------------------------------------|---------------------------------------------------------------------------------------------------------------------------|-----|-----|---------------------------------------------------|
| <b>NOT OTHERWISE PROVIDED FOR</b>                                             |                                                                                                                           |     |     |                                                   |
| <b>C25<br/>(ELECTROLYTIC OR ELECTROPHORETIC PROCESSES; APPARATUS THEREOF)</b> | <b>B<br/>(ELECTROLYTIC OR ELECTROPHORETIC PROCESSES FOR THE PRODUCTION OF COMPOUNDS OR NON-METALS; APPARATUS THEREOF)</b> |     |     |                                                   |
|                                                                               | 001/04                                                                                                                    | 1   | 0.9 | - by electrolysis of water                        |
| <b>G02<br/>(OPTICS)</b>                                                       | <b>B<br/>(OPTICAL ELEMENTS, SYSTEMS, OR APPARATUS)</b>                                                                    |     |     |                                                   |
|                                                                               | 027/20                                                                                                                    | 1   | 0.9 | - for imaging minute objects, e.g., light-pointer |
| <b>Total</b>                                                                  |                                                                                                                           | 117 | 100 |                                                   |
